# Supplementary material for: Investigation of the mercury(ii) coordination chemistry of tris[(1-methylimidazol-2-yl)methyl]amine by X-ray crystallography and NMR
Source: Royal Society of Chemistry journal article supplement (doi:10.1039/b300001j), 2003-01-01
Supplement: b300001j.pdf [file b300001j.pdf]

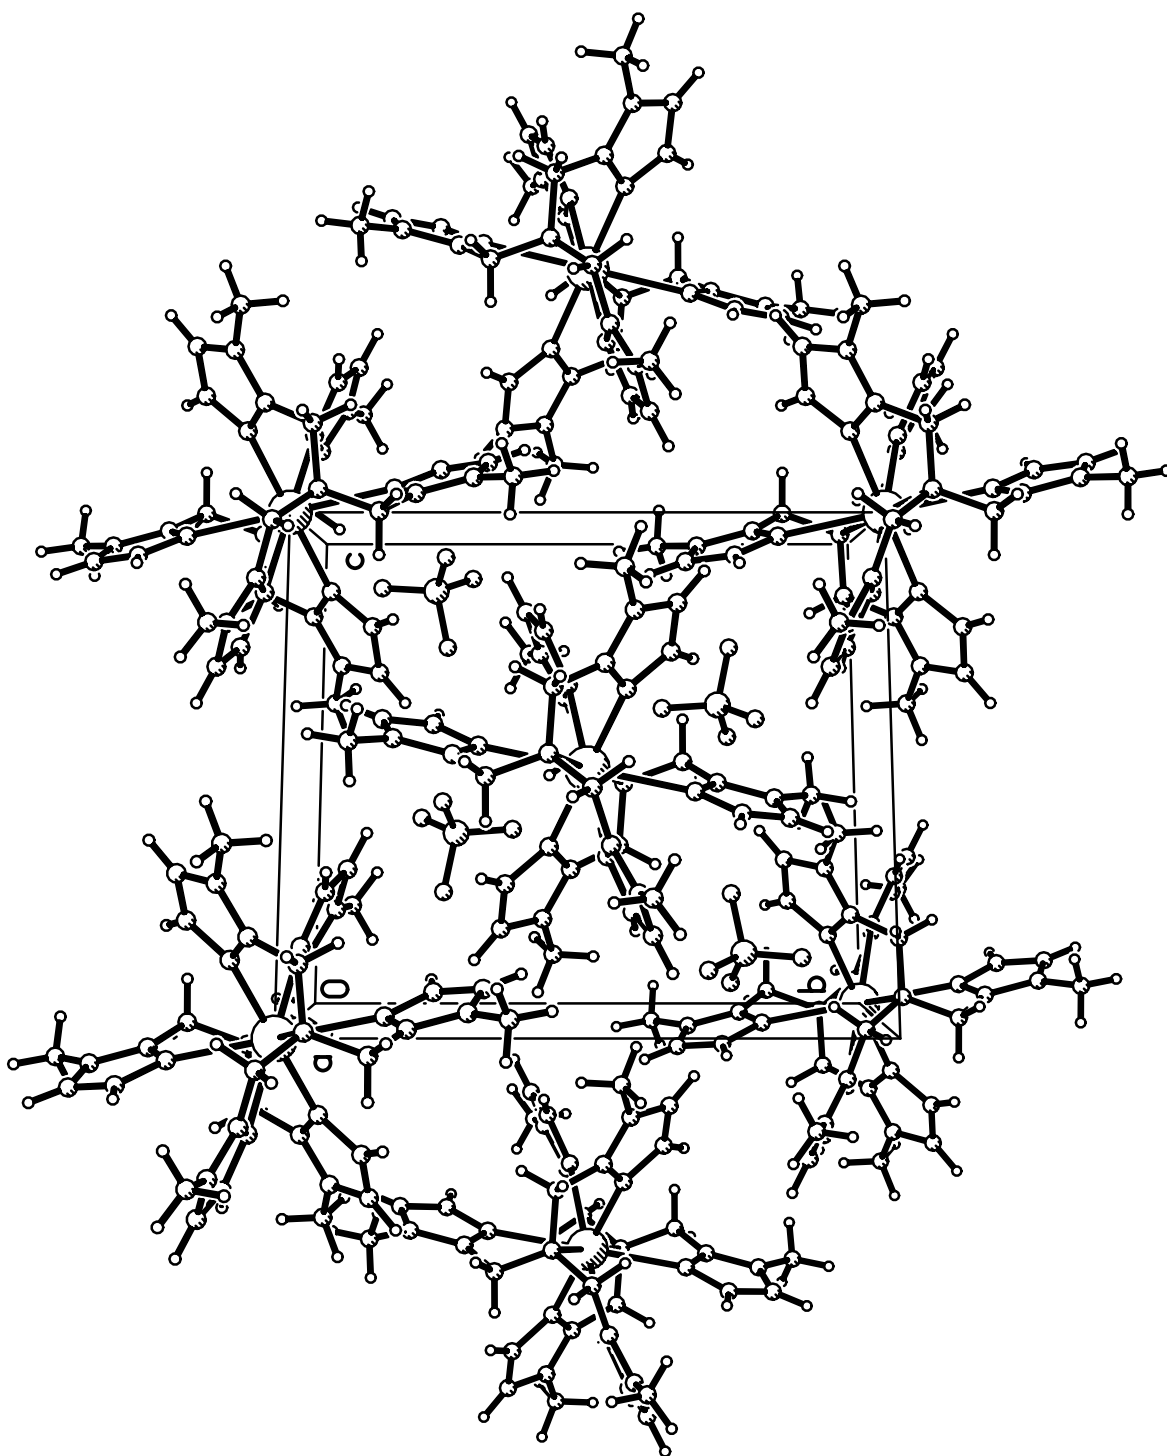

**Figure S1.** Cell packing diagram for [Hg(TMIMA)<sub>2</sub>](ClO<sub>4</sub>)<sub>2</sub> (**1**).

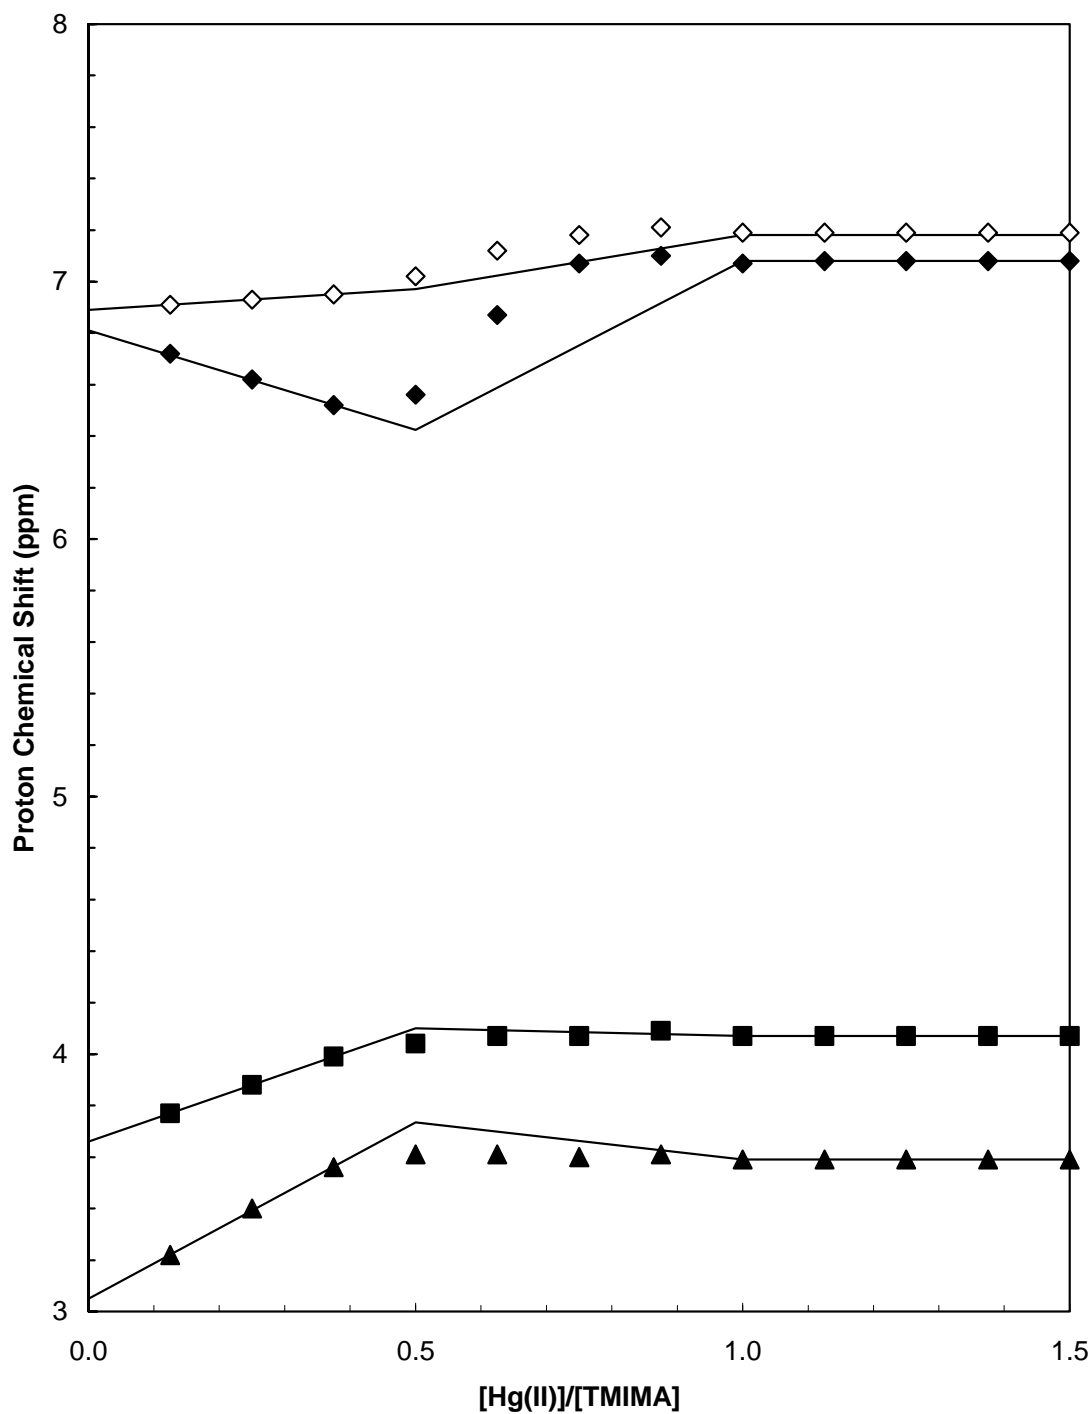

**Figure S2.** Chemical shifts of protons of TMIMA as a function of the nominal  $\text{Hg}(\text{ClO}_4)_2$ -to-TMIMA ratio in  $\text{CD}_3\text{CN}$  at  $20^\circ\text{C}$ . The nominal concentration of  $\text{Hg}(\text{ClO}_4)_2$  was fixed at 2 mM. The lines represent the chemical shifts expected if **1** was thermodynamically more stable than **2**, interconversion of **1** with free ligand and **2** were rapid, **2** was in slow exchange with excess metal and no other ligand containing species were formed. Deviations from these lines indicate involvement of additional metal–ligand species. Proton assignments:  $\blacklozenge$  H<sub>a</sub>;  $\diamond$  H<sub>b</sub>;  $\blacktriangle$  H<sub>c</sub>;  $\blacksquare$  H<sub>d</sub>.

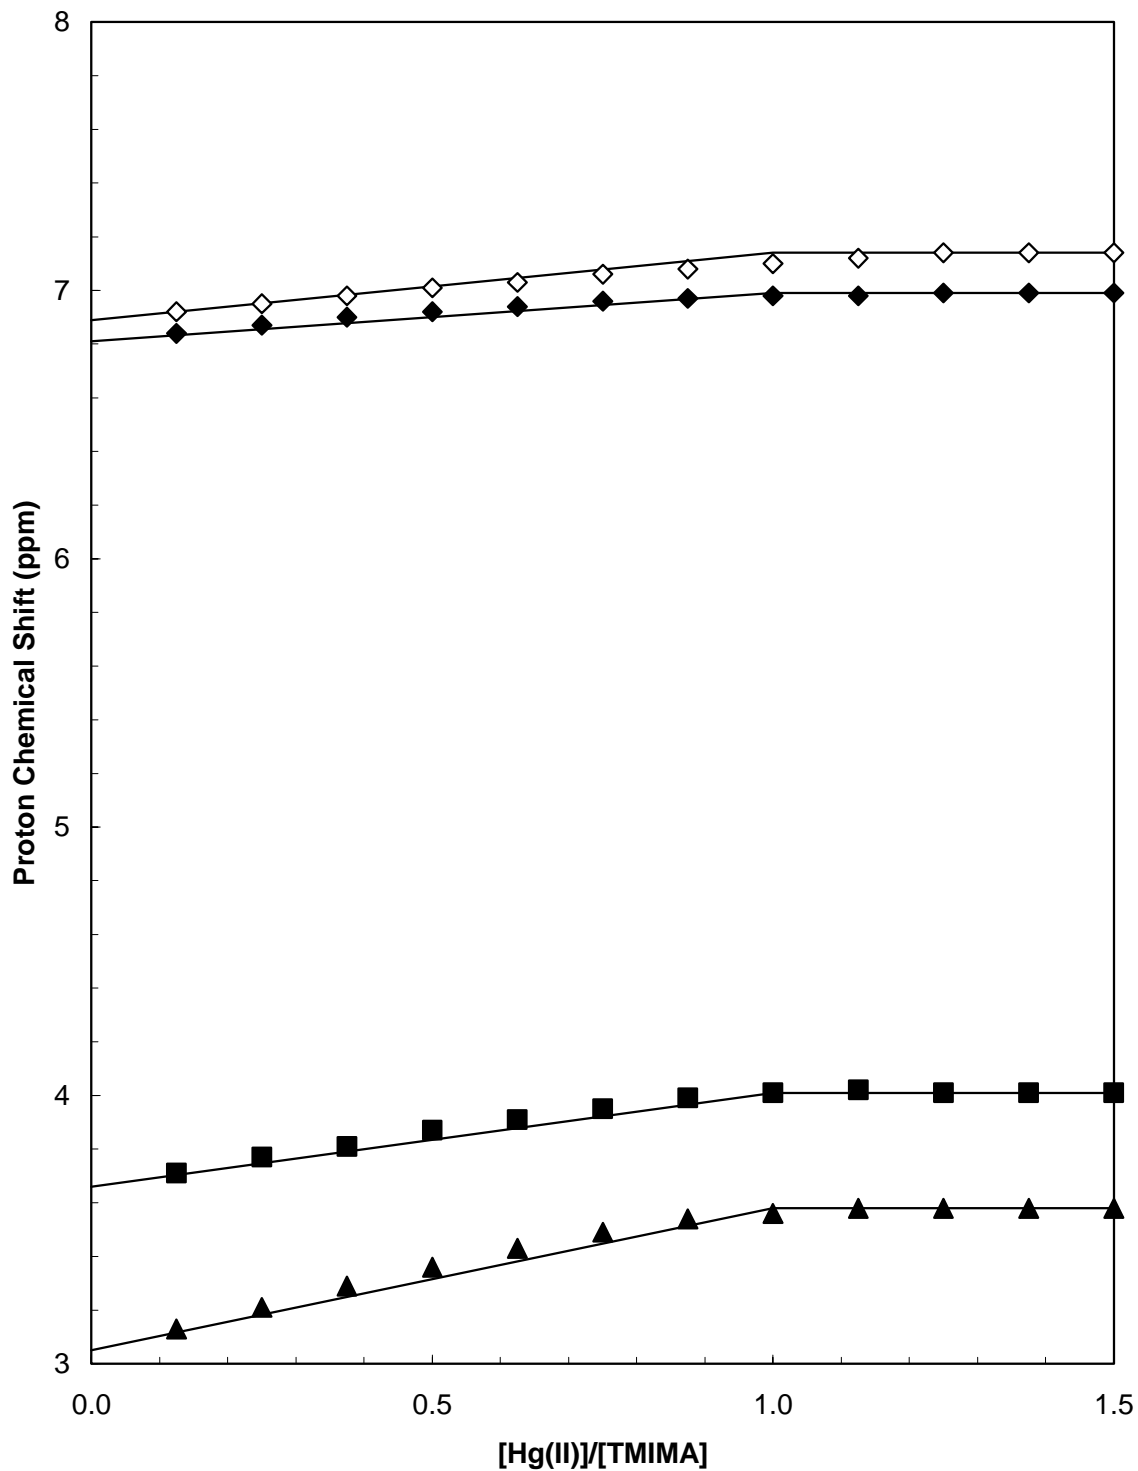

**Figure S3.** Chemical shifts of protons of TMIMA as a function of the nominal HgCl<sub>2</sub>-to-TMIMA ratio in CD<sub>3</sub>CN at 21 °C. The nominal concentration of Hg(ClO<sub>4</sub>)<sub>2</sub> was fixed at 2 mM. The lines represent the chemical shifts expected if interconversion of free ligand and **3** was rapid but **3** exchanged slowly with excess metal. Proton assignments: ◆ H<sub>a</sub>; ◇ H<sub>b</sub>; ▲ H<sub>c</sub>; ■ H<sub>d</sub>.

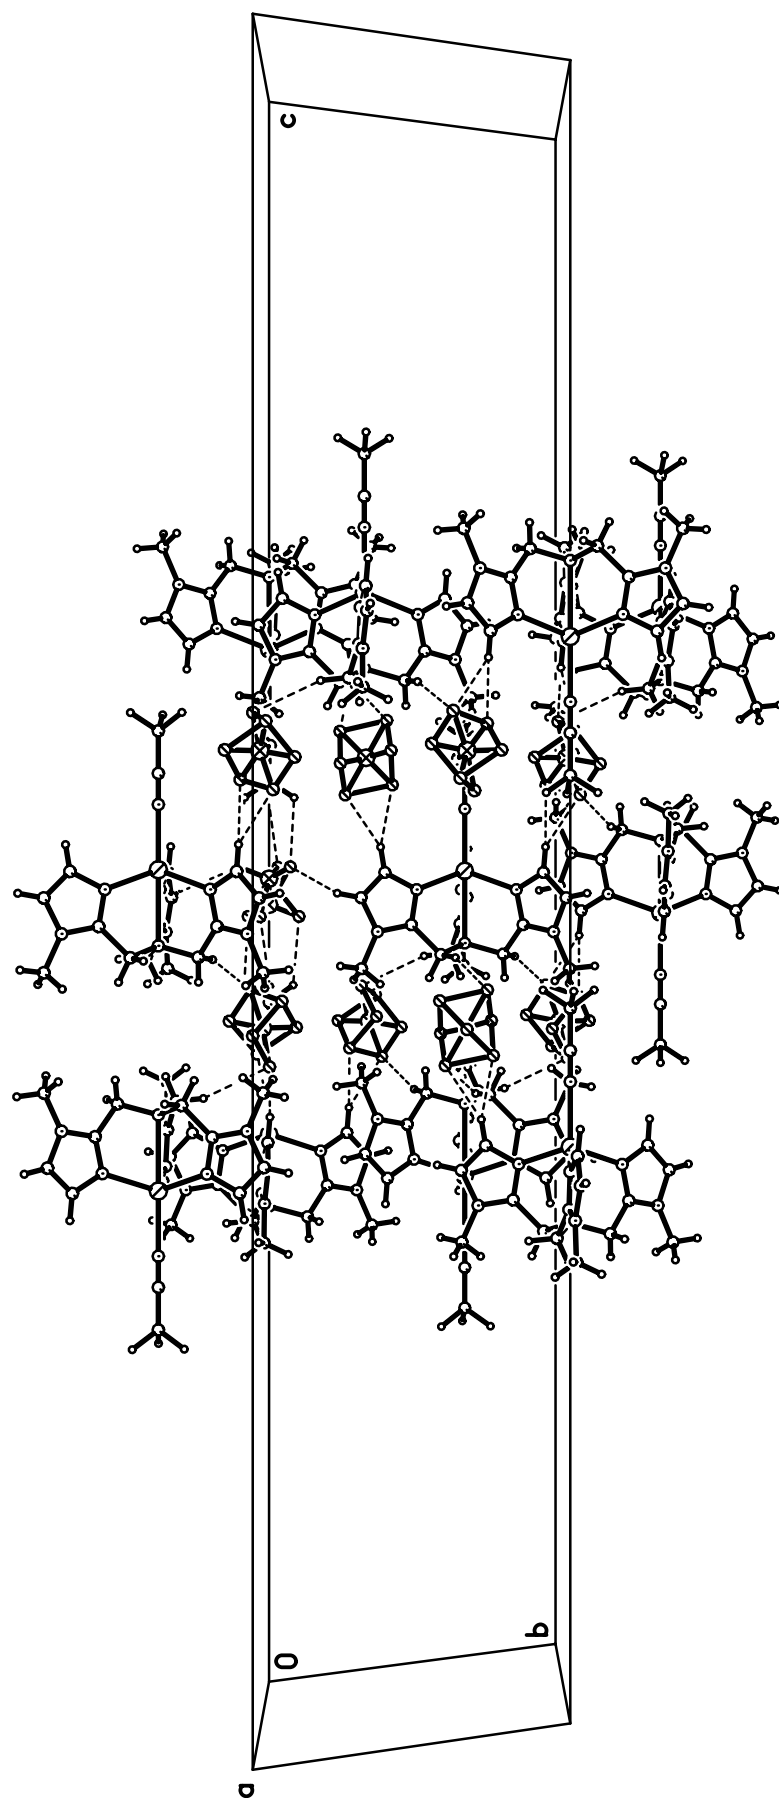

**Figure S4.** Cell packing diagram for  $[\text{Hg}(\text{TMIMA})(\text{NCCH}_3)](\text{ClO}_4)_2$  (2).

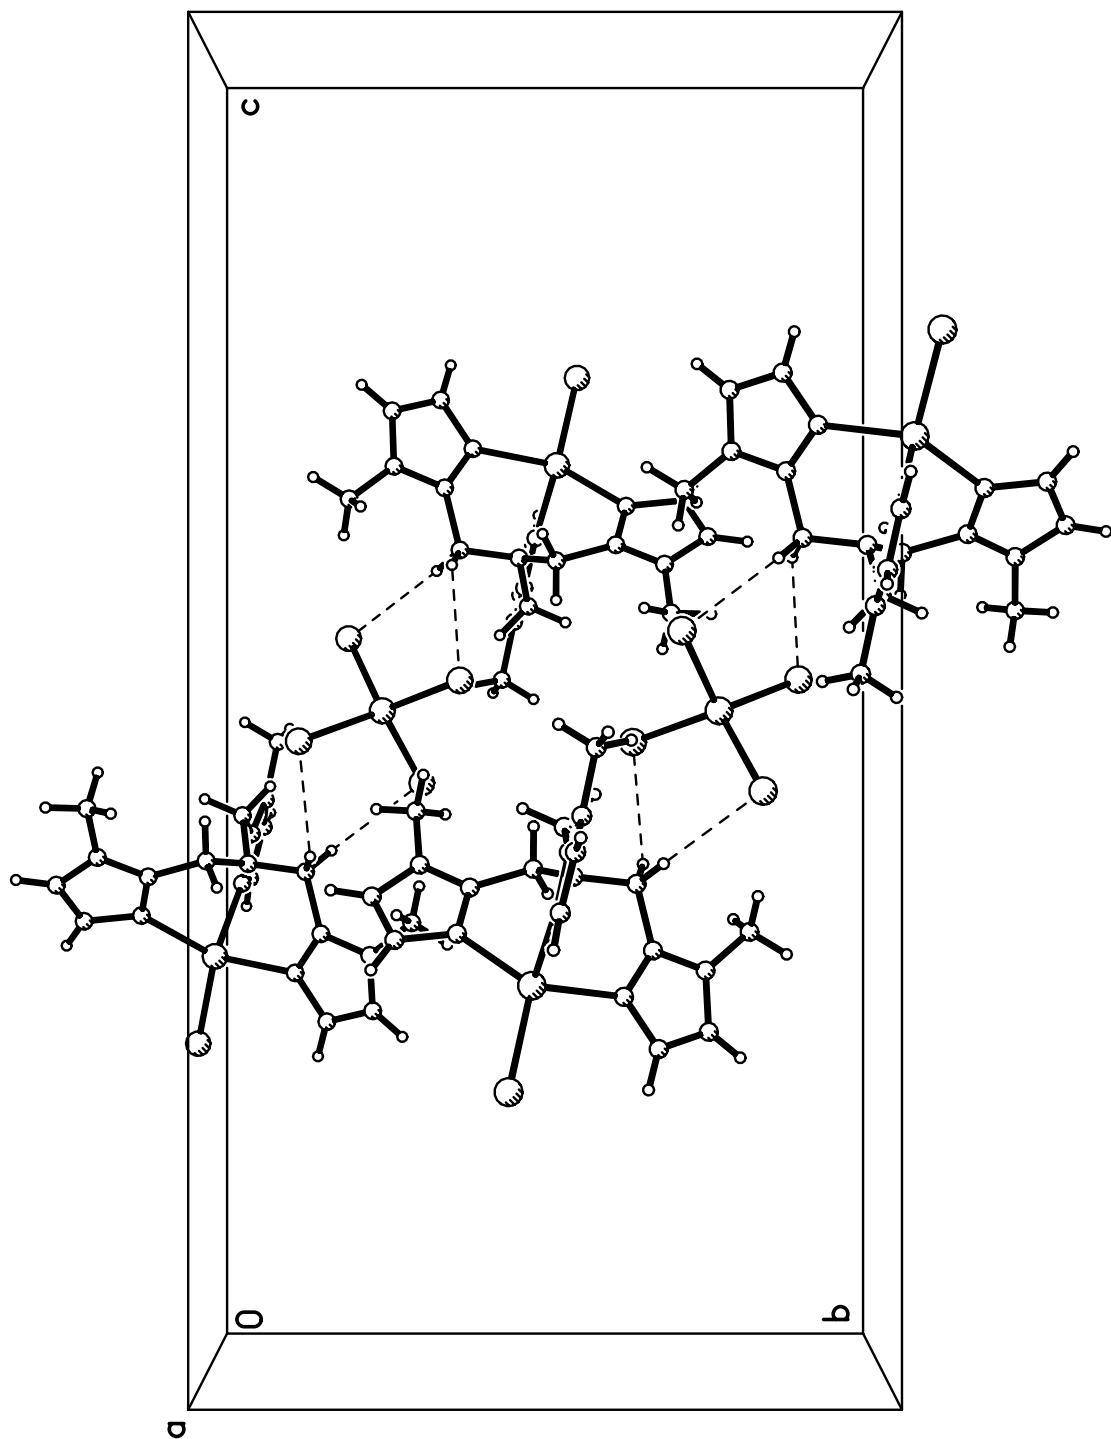

**Figure S5.** Cell packing diagram for [Hg(TMIMA)Cl](HgCl<sub>4</sub>) (3).
